# Supplementary material for: Updating the Comparative Evidence on Second‐Generation Antipsychotic Use With Schizophrenia
Source: Atypon-hosted journal article supplement (doi:10.1176/appi.prcp.20200004), 2020-06-29
Supplement: rcp21012-sup-0001-suppl-data.pdf [file rcp21012-sup-0001-suppl-data.pdf]

**Literature flow diagram**

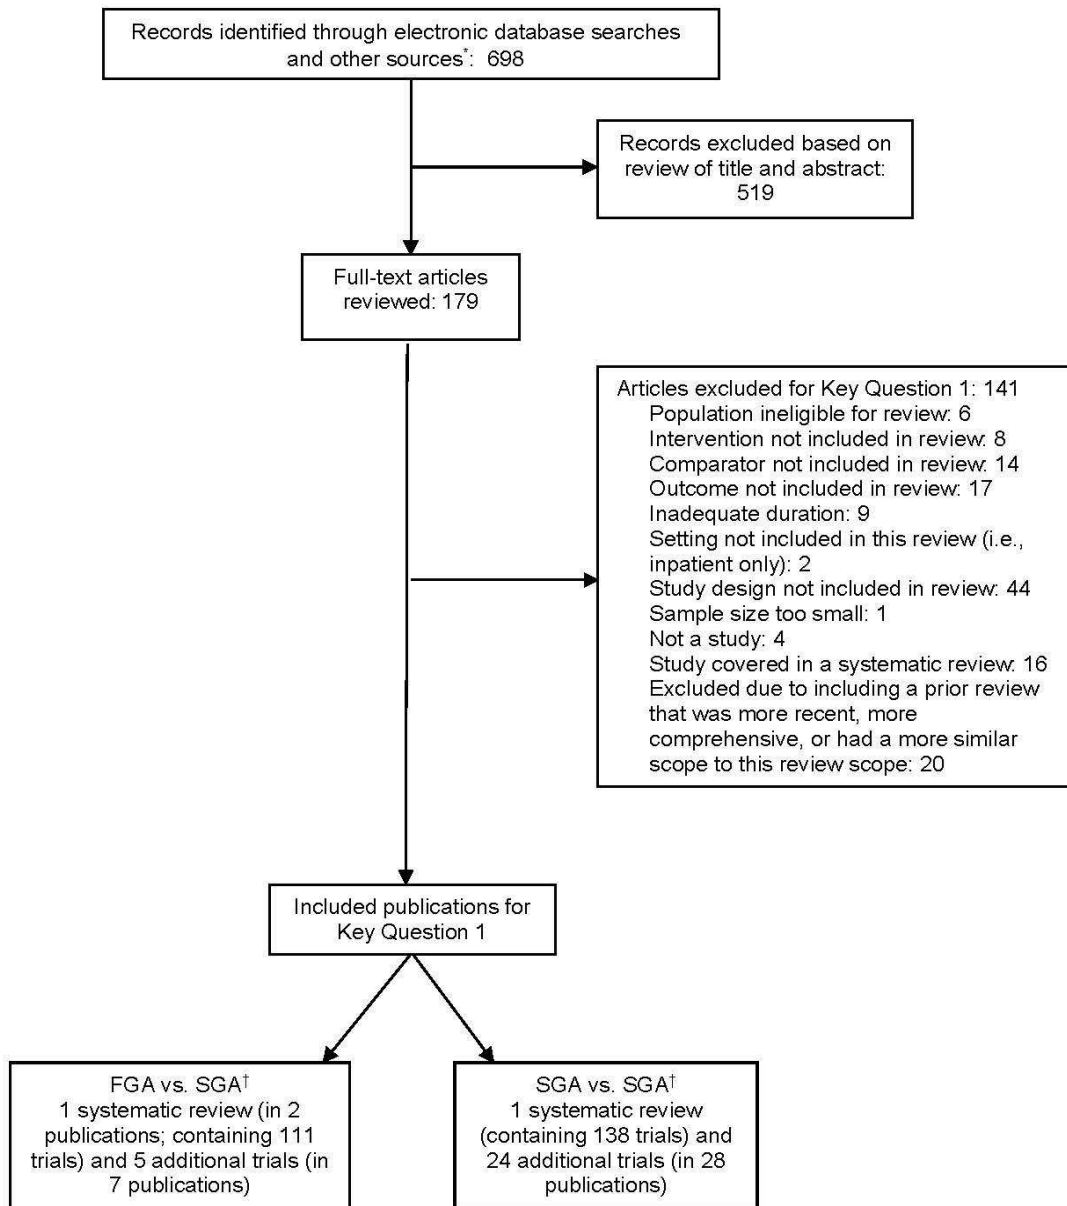

FGA = first-generation antipsychotic; SGA = second-generation antipsychotic

\* Other sources include prior reports, references lists, referrals from experts, and grey literature.

† Some studies were included for both FGA vs. SGA and SGA vs. SGA sections.



**Network Meta-analysis results for Response: SGA versus SGA (odds ratio, 95% confidence interval)**

|                     |                           |                     |                      |                     |                     |                            |                     |                            |                            |                     |
|---------------------|---------------------------|---------------------|----------------------|---------------------|---------------------|----------------------------|---------------------|----------------------------|----------------------------|---------------------|
| <b>Aripiprazole</b> | 1.05<br>(0.35-3.02)       | 0.97<br>(0.57-1.68) | 0.57<br>(0.20-1.63)  | 1.16<br>(0.56-2.58) | 0.70<br>(0.35-1.45) | 0.67<br>(0.45-1.02)        | 1.11<br>(0.65-2.00) | 1.15<br>(0.77-1.78)        | 0.81<br>(0.58-1.16)        | 0.98<br>(0.59-1.58) |
| 0.96<br>(0.33-2.86) | <b>Aripiprazole LAI-1</b> | 0.93<br>(0.28-3.13) | 0.55<br>(0.13-2.44)  | 1.12<br>(0.30-4.26) | 0.67<br>(0.25-1.89) | 0.65<br>(0.18-2.26)        | 1.06<br>(0.32-3.78) | 1.08<br>(0.35-3.57)        | 0.78<br>(0.25-2.52)        | 0.93<br>(0.28-3.16) |
| 1.03<br>(0.59-1.76) | 1.08<br>(0.32-3.53)       | <b>Asenapine</b>    | 0.59<br>(0.18-1.81)  | 1.20<br>(0.54-2.82) | 0.72<br>(0.33-1.64) | 0.69<br>(0.41-1.20)        | 1.15<br>(0.57-2.32) | 1.18<br>(0.69-2.09)        | 0.83<br>(0.49-1.43)        | 1.01<br>(0.54-1.86) |
| 1.75<br>(0.61-5.05) | 1.83<br>(0.41-7.68)       | 1.69<br>(0.55-5.44) | <b>Brexpiprazole</b> | 2.03<br>(0.62-7.08) | 1.23<br>(0.33-4.52) | 1.18<br>(0.36-3.90)        | 1.94<br>(0.58-6.64) | 1.99<br>(0.67-6.25)        | 1.43<br>(0.46-4.46)        | 1.70<br>(0.53-5.51) |
| 0.86<br>(0.39-1.79) | 0.90<br>(0.24-3.31)       | 0.83<br>(0.36-1.87) | 0.49<br>(0.14-1.63)  | <b>Cariprazine</b>  | 0.59<br>(0.23-1.56) | 0.58<br>(0.25-1.26)        | 0.95<br>(0.39-2.36) | 0.98<br>(0.48-2.04)        | 0.70<br>(0.33-1.44)        | 0.84<br>(0.36-1.87) |
| 1.43<br>(0.69-2.88) | 1.50<br>(0.53-4.06)       | 1.38<br>(0.61-3.05) | 0.82<br>(0.22-3.00)  | 1.69<br>(0.65-4.38) | <b>Clozapine</b>    | 0.96<br>(0.46-1.96)        | 1.58<br>(0.69-3.71) | 1.63<br>(0.84-3.36)        | 1.16<br>(0.61-2.24)        | 1.39<br>(0.63-2.94) |
| 1.49<br>(0.98-2.22) | 1.54<br>(0.45-5.48)       | 1.44<br>(0.83-2.47) | 0.85<br>(0.26-2.79)  | 1.74<br>(0.79-3.94) | 1.04<br>(0.51-2.19) | <b>Olanzapine</b>          | 1.65<br>(0.95-2.95) | <b>1.71</b><br>(1.11-2.68) | 1.21<br>(0.94-1.59)        | 1.45<br>(0.94-2.25) |
| 0.90<br>(0.50-1.54) | 0.94<br>(0.26-3.12)       | 0.87<br>(0.43-1.75) | 0.52<br>(0.15-1.74)  | 1.05<br>(0.42-2.56) | 0.63<br>(0.27-1.45) | 0.61<br>(0.34-1.05)        | <b>Paliperidone</b> | 1.03<br>(0.55-1.94)        | 0.73<br>(0.42-1.27)        | 0.88<br>(0.44-1.71) |
| 0.87<br>(0.56-1.29) | 0.92<br>(0.28-2.85)       | 0.85<br>(0.48-1.46) | 0.50<br>(0.16-1.49)  | 1.02<br>(0.49-2.09) | 0.61<br>(0.30-1.19) | <b>0.59</b><br>(0.37-0.90) | 0.97<br>(0.52-1.81) | <b>Quetiapine</b>          | <b>0.71</b><br>(0.50-0.99) | 0.85<br>(0.50-1.39) |
| 1.23<br>(0.86-1.71) | 1.29<br>(0.40-4.08)       | 1.20<br>(0.70-2.02) | 0.70<br>(0.22-2.16)  | 1.43<br>(0.69-3.00) | 0.86<br>(0.45-1.65) | 0.83<br>(0.63-1.07)        | 1.36<br>(0.79-2.40) | <b>1.41</b><br>(1.01-2.00) | <b>Risperidone</b>         | 1.20<br>(0.78-1.82) |
| 1.03<br>(0.63-1.70) | 1.08<br>(0.32-3.59)       | 0.99<br>(0.54-1.85) | 0.59<br>(0.18-1.90)  | 1.19<br>(0.53-2.81) | 0.72<br>(0.34-1.58) | 0.69<br>(0.44-1.07)        | 1.14<br>(0.59-2.27) | 1.18<br>(0.72-2.01)        | 0.84<br>(0.55-1.28)        | <b>Ziprasidone</b>  |

Comparisons between treatments should be read from left to right and the estimate in each cell represents comparison between the row-defining treatment and the column-defining treatment. Odds ratios (ORs) higher than 1 favor the column-defining treatment, meaning less withdrawal in the column-defining treatment; and ORs less than 1 favor the row-defining treatment, meaning less withdrawal in the row-defining treatment. For example, the OR for comparing QUE (row-defining treatment) vs. RIS (column-defining treatment) is 0.71 (95% CrI 0.50 to 0.99), which means that QUE has lower odds of response and the comparison favors RIS, which has greater response. Each comparison is represented twice in the table, for example, for two treatments A and B, once with A versus B and once with B versus A (i.e. the reciprocal OR). For the example above, the OR for comparing RIS (now the row-defining treatment) vs. QUE (now the column-defining treatment) is 1.41 (95% CI 1.01 to 2.00), which means that RIS has a higher odds of response and again, it means that the comparison favors RIS, which has greater response. Significant results are in bold. LAI = long-acting injection; 1 = once monthly-

## Strength of Evidence Ratings

**Table 1. Strength of evidence: second-generation antipsychotic versus second-generation antipsychotic**

| Outcome                   | Comparators                                           | Number of Studies<br>Number of Subjects                               | Study Limitations                                | Consistency                                         | : Directness                                 | Precision                                        | Magnitude of Effect:<br>Summary Effect Size<br>(95% CI)                                                                                                                                                                                                           | Strength of Evidence<br>(High, Moderate, Low, Insufficient) |
|---------------------------|-------------------------------------------------------|-----------------------------------------------------------------------|--------------------------------------------------|-----------------------------------------------------|----------------------------------------------|--------------------------------------------------|-------------------------------------------------------------------------------------------------------------------------------------------------------------------------------------------------------------------------------------------------------------------|-------------------------------------------------------------|
| <b>Social Functioning</b> | Olanzapine, risperidone, quetiapine immediate-release | 1 SR <sup>1</sup> (2 RCTs; N =358;) (1 observational study; N = 9028) | Moderate<br><br>Observational evidence: Moderate | Inconsistent<br><br>Observational evidence: Unknown | Direct<br><br>Observational evidence: Direct | Imprecise<br><br>Observational evidence: Precise | Inconclusive:<br>RCT 1: no significant differences on RFS or the SAS-SMI<br>RCT 2: Change on SFS greater with App H olanzapine (+7.75) than risperidone (-0.92; P=0.0028) (Socially active: OR 1.27, 95% CI 1.05 to 1.54 olanzapine 84.6% vs. risperidone 82.4%). | Insufficient                                                |
| Social Functioning        | Paliperidone monthly LAI vs. risperidone q 2 wks LAI  | 1 SR <sup>1</sup> (2 RCTs; N = 452)                                   | Moderate                                         | Inconsistent                                        | Direct                                       | Precise                                          | No statistically significant differences in PSP scale: mean change from baseline 16.8 paliperidone and 18.6 risperidone; (LSM difference 0.5, 95% CI -2.14 to 3.12)                                                                                               | Low                                                         |
| Social Functioning        | Paliperidone extended release vs. olanzapine          | 1 Meta-analysis of selected studies <sup>2</sup>                      | High                                             | Unknown                                             | Direct                                       | Precise                                          | No significant difference in PSP scale (change 7.8 to 12.2 in paliperidone dose u vs. 8.7 in olanzapine group).                                                                                                                                                   | Insufficient                                                |

| <b>Outcome</b>                           | <b>Comparators</b>                                            | <b>Number of Studies<br/>Number of Subjects</b>       | <b>Study Limitations</b>                | <b>Consistency</b>                                 | <b>: Directness</b>                      | <b>Precision</b>                               | <b>Magnitude of Effect:<br/>Summary Effect Size<br/>(95% CI)</b>                                                                                                          | <b>Strength of Evidence<br/>(High, Moderate, Low, Insufficient)</b> |
|------------------------------------------|---------------------------------------------------------------|-------------------------------------------------------|-----------------------------------------|----------------------------------------------------|------------------------------------------|------------------------------------------------|---------------------------------------------------------------------------------------------------------------------------------------------------------------------------|---------------------------------------------------------------------|
| Social Functioning                       | Risperidone LAI vs. Quetiapine immediate release              | 1 RCT <sup>3</sup> (N = 666)                          | Moderate                                | Unknown                                            | Direct                                   | Precise                                        | Risperidone LAI resulted in greater improvements in SOFA at 6 months (6.1 vs. 2.7; P = 0.02), 12 months (9.5 vs. 6.1; P = 0.009), and endpoint (6.6 vs. 1.1; P < 0.0001). | Low                                                                 |
| <b>Employment Outcomes</b>               | Older SGAs (olanzapine, risperidone, quetiapine, ziprasidone) | 1 SR <sup>1</sup> (2 RCTs, 3 observational N = 1,379) | Low<br>Observational evidence: Moderate | Inconsistent<br>Observational evidence: Consistent | Direct<br>Observational evidence: Direct | Imprecise<br>Observational evidence: Imprecise | No significant differences in rates of employment (mean 18% in CATIE Phase I)                                                                                             | Low                                                                 |
| <b>Occupation and Residential Status</b> | Older SGAs (olanzapine, risperidone, quetiapine, ziprasidone) | 1 SR <sup>1</sup> (21 RCT, N = 771)                   | Moderate                                | Unknown                                            | Direct                                   | Imprecise                                      | Inconclusive: 75.5% and 75.3% had stable status, 3.8% and 3.1% improved status (NS)                                                                                       | Insufficient                                                        |
| <b>Global Functioning (GAF)</b>          | Olanzapine vs. Risperidone                                    | 1 SR <sup>1</sup> (4 cohort studies; N = 3211)        | High                                    | Inconsistent                                       | Direct                                   | Precise                                        | No difference: Pooled WMD 0.61, 95% CI, -1.78 – 2.99; I <sup>2</sup> = 43%                                                                                                | Low                                                                 |
| Global Functioning (GAF)                 | Olanzapine vs. Quetiapine                                     | 1 SR <sup>1</sup> (2 RCTs; N = 363)                   | Moderate                                | Consistent                                         | Direct                                   | Imprecise                                      | Pooled WMD 1.14, 95% CI -4.75 to 7.02; Q = 3.99, df = 1; P = 0.045                                                                                                        | Low                                                                 |
| <b>Quality of Life</b>                   | Olanzapine vs. risperidone                                    | 1 SR <sup>1</sup> (2 RCTs; N = 492)                   | Moderate                                | Consistent                                         | Direct                                   | Precise                                        | QLS Change = 12 months 0.19 v 0.26 (P = 0.53); 7 months 13.4 vs. 8.8 (P >0.074)                                                                                           | Moderate                                                            |
| Quality of Life                          | Olanzapine vs. ziprasidone                                    | 1 SR <sup>1</sup> (2 RCTs; N = 740)                   | Moderate                                | Consistent                                         | Direct                                   | Precise                                        | QLS Change = 12 months 0.19 v 0.26 (P NR); 6-7 months Endpoint 61.3 vs. 58.9 (P = 0.36 using mixed-effect modeling)                                                       | Moderate                                                            |
| Quality of Life                          | Olanzapine vs. quetiapine immediate release                   | 1 SR <sup>1</sup> (1 RCT; N = 227)                    | Low                                     | Unknown                                            | Direct                                   | Imprecise                                      | QLS Change = 12 months 0.19 v 0.09 (P >0.05)                                                                                                                              | Low                                                                 |

| Outcome         | Comparators                                               | Number of Studies<br>Number of Subjects | Study Limitations | Consistency | : Directness | Precision | Magnitude of Effect:<br>Summary Effect Size<br>(95% CI)                                                                                                                               | Strength of Evidence<br>(High, Moderate, Low, Insufficient) |
|-----------------|-----------------------------------------------------------|-----------------------------------------|-------------------|-------------|--------------|-----------|---------------------------------------------------------------------------------------------------------------------------------------------------------------------------------------|-------------------------------------------------------------|
| Quality of Life | Olanzapine vs. aripiprazole                               | 1 SR <sup>1</sup> (1 RCT; N = 464)      | Moderate          | Unknown     | Direct       | Imprecise | QLS Change = 12 months 11.7 vs. 11.8 and 11.1 vs. 7.1 (multi-country study reported by hemisphere) P = NS                                                                             | Insufficient                                                |
| Quality of Life | Olanzapine vs. clozapine                                  | 1 SR <sup>1</sup> (1 RCT; N = 114)      | Moderate          | Unknown     | Direct       | Imprecise | SWN: 26 weeks O found non-inferior to C (difference 3.2, 95% CI: 4.2 to 10.5)                                                                                                         | Insufficient                                                |
| Quality of Life | Risperidone vs. ziprasidone                               | 1 SR <sup>1</sup> (N = 154)             | Low               | Unknown     | Direct       | Imprecise | QLS Change = 12 months 0.19 v 0.26 (P >0.05)                                                                                                                                          | Low                                                         |
| Quality of Life | Risperidone vs. Quetiapine                                | 1 SR <sup>1</sup> (1 RCT; N = 189)      | Low               | Unknown     | Direct       | Imprecise | QLS Change = 12 months 0.26 v 0.26 (P >0.05);                                                                                                                                         | Low                                                         |
| Quality of Life | Quetiapine-ER vs. Risperidone                             | 1 RCT; N = 798 <sup>4</sup>             | Moderate          | Unknown     | Direct       | Imprecise | SWN 20% Response 12 months: 65% vs. 68%, adjusted difference (-5.7, 95% CI -15.1 to 3.7) but not meet non-inferiority criteria                                                        | Insufficient                                                |
| Quality of Life | Aripiprazole oral vs. aripiprazole LAI (monthly)          | 1 RCT; N = 724 <sup>5</sup>             | Moderate          | Unknown     | Direct       | Precise   | SF-36 12 months: mental component scores (0.82 vs. 0.38; difference 0.44, 95% CI -1.24 to 2.12) and physical component scores (0.23 vs. -0.27; difference 0.50, 95% CI -1.11 to 2.11) | Low                                                         |
| Quality of Life | Aripiprazole LAI vs. paliperidone palmitate LAI (monthly) | 1 RCT; N = 295 <sup>6</sup>             | Moderate          | Unknown     | Direct       | Imprecise | QLS: 28 weeks change = 7.47 vs. 2.80 (least squares mean difference 4.67, 95% CI 0.32 to 9.02). Meets non-inferiority criteria; not meet MCID                                         | Insufficient                                                |

| <b>Outcome</b>               | <b>Comparators</b>                                                 | <b>Number of Studies<br/>Number of Subjects</b>                                                                                                                                                                       | <b>Study<br/>Limitations</b> | <b>Consistency</b> | <b>: Directness</b> | <b>Precision</b> | <b>Magnitude of Effect:<br/>Summary Effect Size<br/>(95% CI)</b>                                                                                                                                                                       | <b>Strength of<br/>Evidence<br/>(High,<br/>Moderate,<br/>Low,<br/>Insufficient)</b> |
|------------------------------|--------------------------------------------------------------------|-----------------------------------------------------------------------------------------------------------------------------------------------------------------------------------------------------------------------|------------------------------|--------------------|---------------------|------------------|----------------------------------------------------------------------------------------------------------------------------------------------------------------------------------------------------------------------------------------|-------------------------------------------------------------------------------------|
| Quality of Life              | Risperidone LAI vs. quetiapine                                     | 1 RCT; N = 666 <sup>3</sup>                                                                                                                                                                                           | Moderate                     | Unknown            | Direct              | Precise          | SF-12 physical and mental component scores and SQLS-R4 scores improved from baseline in both groups but were not significantly different at endpoint (24 months; SF-12 physical P= 0.09; SF-12 mental and SQLS-R4 P = NR).             | Low                                                                                 |
| <b>Response</b>              |                                                                    | Network meta-analysis of olanzapine, risperidone, quetiapine IR, aripiprazole, clozapine, ziprasidone> asenapine, paliperidone, aripiprazole LAI monthly, caripramine, brexpiprazole, lurasidone 46 RCTs (N = 12,536) | Moderate                     | Consistent         | Indirect            | Precise          | There were 2 statistically significant differences between the drugs; both olanzapine (OR 1.71, 95% CI 1.11,2.68) and risperidone (OR 1.41, 95% CI 1.01,2.00) were significantly more likely to result in response than quetiapine IR. | Low                                                                                 |
| <b>Mortality (All-Cause)</b> | Olanzapine vs. risperidone vs. quetiapine                          | 1 SR <sup>1</sup> (1 retrospective cohort study; N = 48, 595)                                                                                                                                                         | Low                          | Unknown            | Direct              | Precise          | No difference in all-cause mortality between risperidone and olanzapine (HR 1.09, 95% CI 0.79 to 1.49) or quetiapine (HR 0.75, 95% CI 0.53 to 1.07).                                                                                   | Low                                                                                 |
| Mortality (All-Cause)        | Clozapine, risperidone, olanzapine and quetiapine vs. no treatment | 1 SR <sup>1</sup> (1retrospective cohort study; N = 6, 987)                                                                                                                                                           | Low                          | Unknown            | Direct              | Imprecise        | Clozapine and quetiapine had significantly lower risk of all-cause mortality (adjusted ORs 0.35, 95% CI 0.21 to 0.58 and 0.46, 95% CI 0.30 to 0.72), risperidone and olanzapine not statistically significantly different from control | Insufficient                                                                        |
| Mortality (All-Cause)        | Asenapine vs. Olanzapine                                           | 2 RCTs <sup>7,8</sup>                                                                                                                                                                                                 | Moderate                     | Consistent         | Direct              | Imprecise        | Inconclusive: 0.41% vs. 0.42%, 0% vs. 0%, 0.77% vs. 0.32%; RR 2.49 (95% CI 0.54 to 11.5)                                                                                                                                               | Low                                                                                 |

| <b>Outcome</b>                               | <b>Comparators</b>                                       | <b>Number of Studies<br/>Number of Subjects</b>               | <b>Study<br/>Limitations</b> | <b>Consistency</b> | <b>: Directness</b> | <b>Precision</b> | <b>Magnitude of Effect:<br/>Summary Effect Size<br/>(95% CI)</b>                                                          | <b>Strength of<br/>Evidence<br/>(High,<br/>Moderate,<br/>Low,<br/>Insufficient)</b> |
|----------------------------------------------|----------------------------------------------------------|---------------------------------------------------------------|------------------------------|--------------------|---------------------|------------------|---------------------------------------------------------------------------------------------------------------------------|-------------------------------------------------------------------------------------|
| Mortality (All-Cause)                        | Paliperidone palmitate LAI (monthly) vs. Risperidone LAI | 2 RCTs <sup>9,10</sup>                                        | Moderate                     | Consistent         | Direct              | Imprecise        | Inconclusive: 0.79% vs. 0.27%, 0% vs. 0.45%; RR 1.26 (95% CI 0.21 to 7.49)                                                | Low                                                                                 |
| Mortality (All-Cause)                        | Quetiapine vs. Risperidone                               | 2 RCTs <sup>11,12</sup>                                       | Moderate                     | Consistent         | Direct              | Imprecise        | Inconclusive: 1.17% vs. 0.40% and 0.72% vs. 0%; RR 3.24 (95% CI 0.72 to 14.6)                                             | Low                                                                                 |
| <b>Cardio-vascular Mortality</b>             | Olanzapine vs. risperidone vs. quetiapine                | 1 SR <sup>1</sup> (2 retrospective cohort study; N = 55,582)  | Low                          | Consistent         | Direct              | Precise          | No significant differences between the drugs (HRs 0.99, 95% CI 0.37 to 2.67 and 0.76, 95% CI 0.25 to 2.28, respectively). | Low                                                                                 |
| Cardio-vascular Mortality                    | Clozapine vs. risperidone                                | 1 SR <sup>1</sup> (2 retrospective cohort studies; N = 1,686) | Moderate                     | Unknown            | Direct              | Imprecise        | Inconclusive: No significant differences between drugs 4.8% and 2.5%; RR 1.39, 95% CI 0.61 to 2.53                        | Insufficient                                                                        |
| <b>Self-Harm: Suicidal Behavior, Suicide</b> | Clozapine versus olanzapine in high-risk patients        | 1 SR <sup>1</sup> (1 RCT; N = 980)                            | Low                          | Unknown            | Direct              | Imprecise        | Suicidal behavior: HR 0.76, 95% CI 0.58 to 0.97;                                                                          | Low                                                                                 |
| Self-Harm: Suicidal Behavior, Suicide        | Clozapine vs. olanzapine in high-risk patients           | 1 SR <sup>1</sup> (1 RCT; N = 980)                            | Low                          | Unknown            | Direct              | Precise          | Worsening on CGI-Suicide Severity: HR 0.78, 95% CI 0.61 to 0.99                                                           | Moderate                                                                            |
| Self-Harm: Suicidal Behavior, Suicide        | Clozapine vs. olanzapine in high-risk patients           | 1 SR <sup>1</sup> (1 RCT; N = 980)                            | Low                          | Unknown            | Direct              | Imprecise        | Suicide deaths: No significant differences ( 5 clozapine, 3 olanzapine)                                                   | Low                                                                                 |



| <b>Outcome</b>                        | <b>Comparators</b>                                                        | <b>Number of Studies<br/>Number of Subjects</b>         | <b>Study Limitations</b> | <b>Consistency</b> | <b>: Directness</b> | <b>Precision</b> | <b>Magnitude of Effect:<br/>Summary Effect Size<br/>(95% CI)</b>                                                                                                                                                                                                                                                                                                         | <b>Strength of Evidence<br/>(High, Moderate, Low, Insufficient)</b> |
|---------------------------------------|---------------------------------------------------------------------------|---------------------------------------------------------|--------------------------|--------------------|---------------------|------------------|--------------------------------------------------------------------------------------------------------------------------------------------------------------------------------------------------------------------------------------------------------------------------------------------------------------------------------------------------------------------------|---------------------------------------------------------------------|
| Self-Harm: Suicidal Behavior, Suicide | Clozapine, risperidone, olanzapine, quetiapine, ziprasidone, aripiprazole | 1 SR <sup>1</sup> (2 retrospective cohorts; N = 16,584) | Moderate                 | Consistent         | Direct              | Precise          | Death by suicide lower with clozapine: OR 0.29 (0.14 to 0.63) compared with no treatment at 6 months and clozapine (1.1%) lower than baseline (2.2%) or other drugs (range 2.1% to 3.7%) at 1 year.                                                                                                                                                                      | Low                                                                 |
| Self-Harm: Suicidal Behavior, Suicide | Clozapine, risperidone, olanzapine, quetiapine, ziprasidone, aripiprazole | 1 SR <sup>1</sup> (1 prospective cohort; N = 10,204)    | High                     | Unknown            | Direct              | Precise          | Suicide attempts (6 months): No statistically significant difference between drugs                                                                                                                                                                                                                                                                                       | Insufficient                                                        |
| Self-Harm: Suicidal Behavior, Suicide | Clozapine, risperidone, olanzapine, quetiapine, ziprasidone, aripiprazole | 1 SR <sup>1</sup> (1 prospective cohort; N = 20,489)    | High                     | Unknown            | Direct              | Precise          | Inconclusive: Suicide attempts or death by suicide: aripiprazole vs. others combined HR 0.69, 95% CI 0.42 to 1.14                                                                                                                                                                                                                                                        | Insufficient                                                        |
| <b>Core Illness Symptoms</b>          | Oral SGAs (except caripramine)                                            | (212 RCTs) <sup>13</sup>                                | Moderate                 | Consistent         | Indirect            | Precise          | Clozapine had significantly better improvement than the other drugs except olanzapine (SMDs on PANSS or BPRS -0.32 to -0.55. Olanzapine and risperidone superior to the other drugs, except for each other and paliperidone (SMDs -0.13 to -0.26). Paliperidone superior to lurasidone and iloperidone (SMD -0.17). All drugs superior to placebo (SMDs -0.33 to -0.88). | Low                                                                 |

| Outcome                                   | Comparators                                                                                                  | Number of Studies<br>Number of Subjects                                 | Study<br>Limitations | Consistency  | : Directness | Precision | Magnitude of Effect:<br>Summary Effect Size<br>(95% CI)                                                                                                          | Strength of<br>Evidence<br>(High,<br>Moderate,<br>Low,<br>Insufficient) |
|-------------------------------------------|--------------------------------------------------------------------------------------------------------------|-------------------------------------------------------------------------|----------------------|--------------|--------------|-----------|------------------------------------------------------------------------------------------------------------------------------------------------------------------|-------------------------------------------------------------------------|
| Core Illness<br>Symptoms                  | Treatment resistant<br>patients: clozapine,<br>risperidone,<br>olanzapine,<br>quetiapine, and<br>ziprasidone | (40 RCTs) <sup>14</sup>                                                 | Moderate             | Consistent   | Indirect     | Precise   | The only significant<br>difference was that the mean<br>change in the PANSS<br>greater with olanzapine than<br>quetiapine (SMD -0.29, 95%<br>CI -0.56 to -0.13). | Low                                                                     |
| Core Illness<br>Symptoms                  | Brexpiprazole vs.<br>aripiprazole                                                                            | (N=97) <sup>15</sup>                                                    | Moderate             | Unknown      | Indirect     | Imprecise | Inconclusive:<br>PANSS scale -22.9 vs. -19.4<br>from baseline; direct<br>comparison not reported.                                                                | Insufficient                                                            |
| <b>Overall/Any<br/>Adverse<br/>Events</b> |                                                                                                              |                                                                         |                      |              |              |           |                                                                                                                                                                  |                                                                         |
| Overall/Any<br>Adverse<br>Events          | Asenapine vs.<br>olanzapine                                                                                  | 5 RCTs (4 publications); N<br>= 2189) <sup>7,8,16,17</sup>              | Moderate             | Consistent   | Direct       | Precise   | Pooled RR 1.00 (95% CI<br>0.96 – 1.05); I <sup>2</sup> 9%                                                                                                        | Moderate                                                                |
| Overall/Any<br>Adverse<br>Events          | Quetiapine vs.<br>risperidone                                                                                | 7 RCTs (N = 3254) <sup>11,12,18-22</sup>                                | Moderate             | Consistent   | Direct       | Precise   | Pooled 1.04 (95% CI 0.97 to<br>1.12); I <sup>2</sup> 56%                                                                                                         | Moderate                                                                |
| Overall/Any<br>Adverse<br>Events          | Clozapine vs.<br>olanzapine                                                                                  | 2 RCTs (N = 182) <sup>6,20</sup>                                        | Moderate             | Consistent   | Direct       | Imprecise | Pooled RR 1.15 (95% CI =<br>1.00 to 1.33); I <sup>2</sup> 0%                                                                                                     | Low                                                                     |
| Overall/Any<br>Adverse<br>Events          | Risperidone vs.<br>olanzapine                                                                                | 5 RCTs (N = 873) <sup>20-24</sup>                                       | Moderate             | Inconsistent | Direct       | Precise   | Pooled = RR 1.02 (95% CI =<br>0.81 to 1.29); I <sup>2</sup> = 77%                                                                                                | Low                                                                     |
| Overall/Any<br>Adverse<br>Events          | Olanzapine vs.<br>ziprasidone                                                                                | 5 RCTs (N = 1097; 6<br>weeks to 6 months<br>durations) <sup>25-29</sup> | Moderate             | Inconsistent | Direct       | Precise   | Pooled RR 1.00 (95% CI =<br>0.86 to 1.16); I <sup>2</sup> = 80%                                                                                                  | Low                                                                     |
| Overall/Any<br>Adverse<br>Events          | Olanzapine vs.<br>quetiapine                                                                                 | 3 RCTs (N = 448) <sup>20-22</sup>                                       | Moderate             | Consistent   | Direct       | Imprecise | Pooled RR 0.90 (95% CI<br>0.74 to 1.11); I <sup>2</sup> = 30%                                                                                                    | Low                                                                     |

| Outcome                          | Comparators                                                                                                                                                                                                                                                                                                                                                                                     | Number of Studies<br>Number of Subjects | Study<br>Limitations | Consistency | : Directness | Precision | Magnitude of Effect:<br>Summary Effect Size<br>(95% CI)                       | Strength of<br>Evidence<br>(High,<br>Moderate,<br>Low,<br>Insufficient) |
|----------------------------------|-------------------------------------------------------------------------------------------------------------------------------------------------------------------------------------------------------------------------------------------------------------------------------------------------------------------------------------------------------------------------------------------------|-----------------------------------------|----------------------|-------------|--------------|-----------|-------------------------------------------------------------------------------|-------------------------------------------------------------------------|
| Overall/Any<br>Adverse<br>Events | Quetiapine ER<br>versus quetiapine IR<br>and risperidone;<br>risperidone versus<br>clozapine and<br>aripiprazole;<br>olanzapine versus<br>paliperidone;<br>risperidone LAI<br>versus paliperidone<br>and paliperidone<br>palmitate monthly<br>LAI; and aripiprazole<br>versus aripiprazole<br>monthly LAI.<br>Additionally there<br>were six trials<br>comparing<br>asenapine and<br>olanzapine | 1 SR (28 RCTs; N = 7810)                | Moderate             | Consistent  | Direct       | Imprecise | No statistically significant<br>differences were found in<br>each comparison. | Low                                                                     |

| Outcome                    | Comparators                                                                                                                                                                                                                                                                                                                                                                                                                                              | Number of Studies<br>Number of Subjects | Study Limitations | Consistency | : Directness | Precision | Magnitude of Effect:<br>Summary Effect Size<br>(95% CI)                                   | Strength of Evidence<br>(High, Moderate, Low, Insufficient) |
|----------------------------|----------------------------------------------------------------------------------------------------------------------------------------------------------------------------------------------------------------------------------------------------------------------------------------------------------------------------------------------------------------------------------------------------------------------------------------------------------|-----------------------------------------|-------------------|-------------|--------------|-----------|-------------------------------------------------------------------------------------------|-------------------------------------------------------------|
| Overall/Any Adverse Events | Oral aripiprazole versus brexpiprazole, olanzapine, paliperidone, and risperidone LAI; ziprasidone versus clozapine, risperidone, iloperidone and lurasidone; risperidone versus asenapine, caripramine and risperidone LAI; clozapine versus quetiapine, quetiapine versus risperidone LAI; olanzapine versus olanzapine LAI and lurasidone; aripiprazole monthly LAI versus paliperidone; and paliperidone palmitate monthly LAI versus 3-monthly LAI. | 1 SR (31 RCTs; N = 6700)                | Moderate          | Unknown     | Direct       | Imprecise | No statistically significant differences were found in single studies of each comparison. | Insufficient                                                |

| Outcome                                      | Comparators                                                                                                                                                                                                                                                                                                                       | Number of Studies<br>Number of Subjects | Study Limitations | Consistency | : Directness | Precision | Magnitude of Effect:<br>Summary Effect Size<br>(95% CI)                                                                                                                                                                                                                                                                                                                                                                                                                                                                                                                                                                                                                                                                                                                                                                                                        | Strength of Evidence<br>(High, Moderate, Low, Insufficient) |
|----------------------------------------------|-----------------------------------------------------------------------------------------------------------------------------------------------------------------------------------------------------------------------------------------------------------------------------------------------------------------------------------|-----------------------------------------|-------------------|-------------|--------------|-----------|----------------------------------------------------------------------------------------------------------------------------------------------------------------------------------------------------------------------------------------------------------------------------------------------------------------------------------------------------------------------------------------------------------------------------------------------------------------------------------------------------------------------------------------------------------------------------------------------------------------------------------------------------------------------------------------------------------------------------------------------------------------------------------------------------------------------------------------------------------------|-------------------------------------------------------------|
| <b>Discontinuation Due to Adverse Events</b> | Network meta-analysis of aripiprazole, aripiprazole monthly LAI, asenapine, brexipiprazole, cariprazine, clozapine, iloperidone, lurasidone <sup>10</sup> , olanzapine, olanzapine LAI, paliperidone 3-month LAI, paliperidone, paliperidone Monthly LAI, quetiapine ER, quetiapine IR, risperidone, risperidone LAI, ziprasidone | 89 RCTs (N = 29,678)                    | Moderate          | Consistent  | Indirect     | Precise   | LAI risperidone had statistically significantly lower risk of withdrawals due to adverse events than asenapine (OR 0.50, 95% CI 0.23,0.97); clozapine (OR 0.26, 95% CI 0.10,0.67); lurasidone (OR 0.38, 95% CI 0.17,0.79); paliperidone (OR 0.43, 95% CI 0.17,0.98); paliperidone LAI monthly (OR 0.51, 95% CI 0.26,0.98); quetiapine ER (OR 0.42, 95% CI 0.21,0.78); risperidone (OR 0.48, 95% CI 0.23,0.92); and ziprasidone (OR 0.39, 95% CI 0.18,0.76). Olanzapine had lower risk than clozapine (OR 0.40, 95% CI 0.21,0.79); lurasidone (OR 0.58, 95% CI 0.36,0.98); quetiapine IR (OR 0.64, 95% CI 0.45,0.93); risperidone (OR 0.74, 95% CI 0.55,0.98); and ziprasidone (OR 0.59, 95% CI 0.43,0.84). Aripiprazole had lower risk than ziprasidone (OR 0.65, 95% CI 0.44,0.95) and iloperidone had lower risk than clozapine (OR 0.35, 95% CI 0.13,0.91). | Low                                                         |

BPRS=Brief Psychiatric Rating Scale, CATIE=clinical Antipsychotic Trials of Intervention Effectiveness, CGI-S=Clinical Global Impression - Severity, CI=confidence interval, ER=efficacy ratio, GAF=global assessment of functioning, HR=hazard ratio, LAI=long acting injectable, NR=normal range, NS=not significant, NSD=no significant difference, OR=odds ratio, PSP=, Q=Cochran's Q test, QLS=quality of life scale, RCT=randomized controlled trial, RR=relative risk, SF=short form, SFS=Social Functioning Scale, SGA=second-generation antipsychotic, SMD=standard mean difference, SOFA=Social and Occupational Functioning Assessment, SQLS=Schizophrenia Quality of Life Scale, SR=systematic review, WMD=weighted mean difference

**Table 2. Strength of evidence: first-generation antipsychotic versus second-generation antipsychotic**

| <b>Outcome</b>                                            | <b>Comparators</b>              | <b>Number of Studies<br/>Number of<br/>Subjects</b> | <b>Study<br/>Limitations</b> | <b>Consistency</b> | <b>Directness</b> | <b>Precision</b> | <b>Magnitude of Effect:<br/>Summary Effect Size<br/>(95% CI)</b>                                                 | <b>Strength of<br/>Evidence<br/>(High,<br/>Moderate,<br/>Low,<br/>Insufficient)</b> |
|-----------------------------------------------------------|---------------------------------|-----------------------------------------------------|------------------------------|--------------------|-------------------|------------------|------------------------------------------------------------------------------------------------------------------|-------------------------------------------------------------------------------------|
| <b>Function:<br/>General</b>                              | Haloperidol vs.<br>olanzapine   | 1 SR (1 RCT) <sup>30</sup><br>N=208                 | Moderate                     | Unknown            | Direct            | Imprecise        | Inconclusive:<br>GAF effect estimate: -<br>4.00; 95% CI -13.70 to<br>5.70                                        | Insufficient                                                                        |
| <b>Function:<br/>Encounters<br/>with Legal<br/>System</b> | Haloperidol vs.<br>olanzapine   | 1 SR (1 RCT) <sup>30</sup><br>N=31                  | Moderate                     | Unknown            | Direct            | Imprecise        | Inconclusive:<br>Encounters with legal<br>system: RR 3.20, 95%<br>CI 0.76 to 13.46                               | Insufficient                                                                        |
| <b>Function:<br/>Employment</b>                           | Haloperidol vs.<br>risperidone  | 1 SR <sup>30</sup> (1 RCT)<br>N=100                 | Moderate                     | Unknown            | Direct            | Imprecise        | Inconclusive:<br>Proportion of patients<br>with economic<br>independence: RR<br>0.94; 95% CI 0.68 to<br>1.29     | Insufficient                                                                        |
| Function:<br>Employment                                   | Perphenazine vs.<br>olanzapine  | 1 SR <sup>30</sup> (1 RCT)<br>N=597                 | Moderate                     | Unknown            | Direct            | Imprecise        | Inconclusive:<br>Proportion with paid<br>employment: RR 1.29;<br>95% CI 0.70 to 2.38                             | Insufficient                                                                        |
| Function:<br>Employment                                   | Perphenazine vs.<br>quetiapine  | 1 SR <sup>30</sup> (1 RCT)<br>N=598                 | Moderate                     | Unknown            | Direct            | Imprecise        | Inconclusive:<br>Proportion with paid<br>employment: RR 1.75;<br>95% CI 0.90 to 3.43                             | Insufficient                                                                        |
| Function:<br>Employment                                   | Perphenazine vs.<br>risperidone | 1 SR <sup>30</sup> (1 RCT)<br>N=602                 | Moderate                     | Unknown            | Direct            | Imprecise        | Inconclusive:<br>Proportion with paid<br>employment: RR 1.38;<br>95% CI 0.74 to 2.57                             | Insufficient                                                                        |
| Function:<br>Employment                                   | Perphenazine vs.<br>ziprasidone | 1 SR <sup>30</sup> (1 RCT)<br>N=446                 | Moderate                     | Unknown            | Direct            | Imprecise        | Inconclusive:<br>Proportion with paid<br>employment: RR 1.22;<br>95% CI 0.60 to 2.51                             | Insufficient                                                                        |
| <b>Quality of<br/>Life</b>                                | Haloperidol vs.<br>olanzapine   | 1 SR <sup>30</sup> (5 RCTs)<br>N=816                | Moderate                     | Consistent         | Direct            | Precise          | Inconclusive:<br>Effect sizes ranged<br>from -3.62 to 0 using<br>different measures; CIs<br>were not significant | Moderate                                                                            |

| <b>Outcome</b>  | <b>Comparators</b>            | <b>Number of Studies<br/>Number of<br/>Subjects</b> | <b>Study<br/>Limitations</b> | <b>Consistency</b> | <b>Directness</b> | <b>Precision</b> | <b>Magnitude of Effect:<br/>Summary Effect Size<br/>(95% CI)</b>                                                                                                                                                                                                                                     | <b>Strength of<br/>Evidence<br/>(High,<br/>Moderate,<br/>Low,<br/>Insufficient)</b> |
|-----------------|-------------------------------|-----------------------------------------------------|------------------------------|--------------------|-------------------|------------------|------------------------------------------------------------------------------------------------------------------------------------------------------------------------------------------------------------------------------------------------------------------------------------------------------|-------------------------------------------------------------------------------------|
| Quality of Life | Haloperidol vs. quetiapine    | 1 SR <sup>30</sup> (1 RCT)<br>N=207                 | Moderate                     | Unknown            | Direct            | Imprecise        | Inconclusive:<br>Effect estimate 0.00;<br>95% CI -1.38 to 1.38                                                                                                                                                                                                                                       | Insufficient                                                                        |
| Quality of Life | Haloperidol vs. risperidone   | 1 SR <sup>30</sup> (2 RCTs)<br>N=352                | Moderate                     | Inconsistent       | Direct            | Imprecise        | Inconclusive:<br>Effect estimates<br>ranged from -0.10 to<br>0.10; CIs were not<br>significant                                                                                                                                                                                                       | Insufficient                                                                        |
| Quality of Life | Haloperidol vs. ziprasidone   | 1 SR <sup>30</sup> (2 RCTs)<br>N=784                | High                         | Inconsistent       | Direct            | Imprecise        | Studies favored<br>ziprasidone in quality of<br>life measures. One trial<br>found effect favoring<br>ziprasidone based on<br>QLS (effect estimate<br>12.12; 95% CI -22.06<br>to -2.17); there was no<br>difference in another<br>trial in MANSAs (effect<br>estimate -0.10; 95% CI<br>-1.48 to 1.28) | Low                                                                                 |
| Quality of Life | Perphenazine vs. aripiprazole | 1 SR <sup>30</sup> (1 RCT)<br>N=300                 | Moderate                     | Unknown            | Direct            | Imprecise        | Inconclusive:<br>Proportion with 20%<br>improvement: RR 4.74;<br>95% CI 2.58 to 8.69                                                                                                                                                                                                                 | Insufficient                                                                        |
| Quality of Life | Perphenazine vs. olanzapine   | 1 SR <sup>30</sup> (1 RCT)<br>N=597                 | Moderate                     | Unknown            | Direct            | Precise          | No difference:<br>Effect estimate 0.00;<br>95% CI -0.16 to 0.16                                                                                                                                                                                                                                      | Low                                                                                 |
| Quality of Life | Perphenazine vs. quetiapine   | 1 SR <sup>30</sup> (1 RCT)<br>N=598                 | Moderate                     | Unknown            | Direct            | Precise          | No difference:<br>Effect estimate 0.10;<br>95% CI -0.07 to 0.27                                                                                                                                                                                                                                      | Low                                                                                 |
| Quality of Life | Perphenazine vs. risperidone  | 1 SR <sup>30</sup> (1 RCT)<br>N=602                 | Moderate                     | Unknown            | Direct            | Precise          | No difference:<br>Effect estimate -0.07;<br>95% CI -0.24 to 0.10                                                                                                                                                                                                                                     | Low                                                                                 |

| <b>Outcome</b>  | <b>Comparators</b>            | <b>Number of Studies<br/>Number of<br/>Subjects</b> | <b>Study<br/>Limitations</b> | <b>Consistency</b> | <b>Directness</b> | <b>Precision</b> | <b>Magnitude of Effect:<br/>Summary Effect Size<br/>(95% CI)</b>            | <b>Strength of<br/>Evidence<br/>(High,<br/>Moderate,<br/>Low,<br/>Insufficient)</b> |
|-----------------|-------------------------------|-----------------------------------------------------|------------------------------|--------------------|-------------------|------------------|-----------------------------------------------------------------------------|-------------------------------------------------------------------------------------|
| Quality of Life | Perphenazine vs. ziprasidone  | 1 SR <sup>30</sup> (1 RCT)<br>N=446                 | Moderate                     | Unknown            | Direct            | Precise          | No difference:<br>Effect estimate -0.07;<br>95% CI -0.27 to 0.13            | Low                                                                                 |
| <b>Response</b> | Fluphenazine vs. olanzapine   | 1 SR <sup>30</sup> (1 RCT)<br>N=60                  | Moderate                     | Unknown            | Direct            | Imprecise        | Inconclusive:<br>RR 0.74 (95% CI 0.51<br>to 1.07)                           | Insufficient                                                                        |
| Response        | Fluphenazine vs. quetiapine   | 1 SR <sup>30</sup> (1 RCT)<br>N=25                  | Moderate                     | Unknown            | Direct            | Imprecise        | Inconclusive:<br>RR 0.62 (95% CI 0.12<br>to 3.07)                           | Insufficient                                                                        |
| Response        | Fluphenazine vs. risperidone  | 1 SR <sup>30</sup> (1 RCT)<br>N=26                  | Moderate                     | Unknown            | Direct            | Imprecise        | Inconclusive:<br>RR 0.67 (95% CI 0.13<br>to 3.35)                           | Insufficient                                                                        |
| Response        | Haloperidol vs. aripiprazole  | 1 SR <sup>30</sup> (5 RCTs)<br>N=2,185              | Moderate                     | Inconsistent       | Direct            | Precise          | No difference:<br>RR 1.01 (95% CI 0.76<br>to 1.34; I <sup>2</sup> =83%)     | Low                                                                                 |
| Response        | Haloperidol vs. asenapine     | 1 SR <sup>30</sup> (1 RCT)<br>N=335                 | Moderate                     | Unknown            | Direct            | Imprecise        | Inconclusive:<br>RR 0.82 (95% CI 0.64<br>to 1.04)                           | Insufficient                                                                        |
| Response        | Haloperidol vs. clozapine     | 1 SR <sup>30</sup> (2 RCTs)<br>N=144                | Moderate                     | Inconsistent       | Direct            | Imprecise        | Inconclusive:<br>RR 0.64 (95% CI 0.28<br>to 1.47; I <sup>2</sup> = 72%)     | Insufficient                                                                        |
| Response        | Haloperidol vs. olanzapine    | 1 SR <sup>30</sup> (14 RCTs)<br>N=4,099             | Moderate                     | Inconsistent       | Direct            | Precise          | RR 0.86 (95% CI 0.78<br>to 0.96; I <sup>2</sup> =55%); favors<br>olanzapine | Low                                                                                 |
| Response        | Haloperidol vs. quetiapine    | 1 SR <sup>30</sup> (6 RCTs)<br>N=1,421              | Moderate                     | Inconsistent       | Direct            | Precise          | No difference:<br>RR 0.99 (95% CI 0.76<br>to 1.30; I <sup>2</sup> =77%)     | Low                                                                                 |
| Response        | Haloperidol vs. risperidone   | 1 SR <sup>30</sup> (16 RCTs)<br>N=3,452)            | Moderate                     | Consistent         | Direct            | Precise          | No difference:<br>RR 0.94 (95% CI 0.87<br>to 1.02; I <sup>2</sup> =29%)     | Moderate                                                                            |
| Response        | Haloperidol vs. ziprasidone   | 1 SR <sup>30</sup> (6 RCTs)<br>N=1,283              | Moderate                     | Inconsistent       | Direct            | Imprecise        | Inconclusive:<br>RR 0.98 (95% CI 0.74<br>to 1.30; I <sup>2</sup> =80%)      | Low                                                                                 |
| Response        | Perphenazine vs. aripiprazole | 1 SR <sup>30</sup> (1 RCT)<br>N=300                 | Moderate                     | Unknown            | Direct            | Imprecise        | Inconclusive:<br>RR 0.95 (95% CI 0.64<br>to 1.40)                           | Insufficient                                                                        |



| <b>Outcome</b>                        | <b>Comparators</b>             | <b>Number of Studies<br/>Number of<br/>Subjects</b> | <b>Study<br/>Limitations</b> | <b>Consistency</b> | <b>Directness</b> | <b>Precision</b> | <b>Magnitude of Effect:<br/>Summary Effect Size<br/>(95% CI)</b>                                                                              | <b>Strength of<br/>Evidence<br/>(High,<br/>Moderate,<br/>Low,<br/>Insufficient)</b> |
|---------------------------------------|--------------------------------|-----------------------------------------------------|------------------------------|--------------------|-------------------|------------------|-----------------------------------------------------------------------------------------------------------------------------------------------|-------------------------------------------------------------------------------------|
| <b>Remission</b>                      | Haloperidol vs. clozapine      | 1 SR <sup>30</sup> (1 RCT)<br>N=71                  | Moderate                     | Unknown            | Direct            | Imprecise        | Inconclusive:<br>RR 0.16 (95% CI 0.02<br>to 1.20)                                                                                             | Insufficient                                                                        |
| Remission                             | Haloperidol vs. olanzapine     | 1 SR <sup>30</sup> (3 RCTs)<br>N=582                | Moderate                     | Consistent         | Direct            | Imprecise        | RR 0.65 (95% CI 0.45<br>to 0.94; I <sup>2</sup> =54%); favors<br>olanzapine                                                                   | Low                                                                                 |
| Remission                             | Haloperidol vs. quetiapine     | 1 SR <sup>30</sup> (1 RCT)<br>N=207                 | High                         | Unknown            | Direct            | Imprecise        | Inconclusive:<br>RR 0.72 (95% CI 0.41<br>to 1.25)                                                                                             | Insufficient                                                                        |
| Remission                             | Haloperidol vs. risperidone    | 1 SR <sup>30</sup> (2 RCTs)<br>N=179                | Moderate                     | Consistent         | Direct            | Imprecise        | Inconclusive:<br>RR 0.84 (95% CI 0.56<br>to 1.24; I <sup>2</sup> =0%)                                                                         | Low                                                                                 |
| Remission                             | Haloperidol vs. ziprasidone    | 1 SR <sup>30</sup> (3 RCTs)<br>N=1,085              | High                         | Consistent         | Direct            | Precise          | No difference: RR 0.89<br>(95% CI 0.71 to 1.12;<br>I <sup>2</sup> = 12%)                                                                      | Low                                                                                 |
| <b>Reduction in<br/>Self Harm</b>     | Haloperidol vs. olanzapine     | 1 SR <sup>30</sup> (1 RCT)<br>N=182                 | Moderate                     | Unknown            | Indirect          | Imprecise        | Inconclusive:<br>Attempted suicide: RR<br>3.13; 95% CI 0.13 to<br>76 and 0.64<br>Completed suicide: RR<br>3.13; 95% CI 0.13 to<br>76 and 3.86 | Insufficient                                                                        |
| Reduction in<br>Self Harm             | Perphenazine and<br>olanzapine | 1 SR <sup>30</sup> (1 RCT)<br>N=597                 | Moderate                     | Unknown            | Indirect          | Imprecise        | Inconclusive:<br>Attempted suicide: RR<br>0.64; 95% CI 0.06 to<br>7.06<br>Completed suicide: RR<br>3.86; 95% CI 0.40 to<br>37                 | Insufficient                                                                        |
| <b>Overall<br/>Adverse<br/>Events</b> | Haloperidol vs. aripiprazole   | 1 SR <sup>30</sup> (3 RCTS)<br>N=1,713              | Moderate                     | Consistent         | Direct            | Precise          | RR 1.11; 95% CI 1.06<br>to 1.17; I <sup>2</sup> =0%; less<br>with aripiprazole                                                                | Moderate                                                                            |
| Overall<br>Adverse<br>Events          | Haloperidol vs. risperidone    | 1 SR <sup>30</sup> (8 RCTs)<br>N=1,313              | Moderate                     | Consistent         | Direct            | Precise          | RR 1.20; 95% CI 1.01<br>to 1.42; I <sup>2</sup> = 84%; less<br>with risperidone                                                               | Moderate                                                                            |
| Overall<br>Adverse<br>Events          | Haloperidol vs. ziprasidone    | 1 SR <sup>30</sup> (6 RCTs)<br>N=1,448              | Moderate                     | Consistent         | Direct            | Precise          | RR 1.13; 95% CI 1.03<br>to 1.23; I <sup>2</sup> =31%; less<br>with ziprasidone                                                                | Moderate                                                                            |

| <b>Outcome</b>                                      | <b>Comparators</b>              | <b>Number of Studies<br/>Number of<br/>Subjects</b>           | <b>Study<br/>Limitations</b> | <b>Consistency</b> | <b>Directness</b> | <b>Precision</b> | <b>Magnitude of Effect:<br/>Summary Effect Size<br/>(95% CI)</b>      | <b>Strength of<br/>Evidence<br/>(High,<br/>Moderate,<br/>Low,<br/>Insufficient)</b> |
|-----------------------------------------------------|---------------------------------|---------------------------------------------------------------|------------------------------|--------------------|-------------------|------------------|-----------------------------------------------------------------------|-------------------------------------------------------------------------------------|
| <b>Withdrawal<br/>Due to<br/>Adverse<br/>Events</b> | Fluphenazine vs.<br>olanzapine  | 1 SR <sup>30</sup> (1 RCT)<br>N=60                            | Moderate                     | Unknown            | Indirect          | Imprecise        | Inconclusive:<br>RR 0.74; 95% CI 0.51<br>to 1.07                      | Insufficient                                                                        |
|                                                     | Fluphenazine vs.<br>quetiapine  | 1 SR <sup>30</sup> (1 RCT)<br>N=25                            | Moderate                     | Unknown            | Indirect          | Imprecise        | Inconclusive:<br>RR 0.19; 95% CI 0.01<br>to 3.52                      | Insufficient                                                                        |
| Withdrawal<br>Due to<br>Adverse<br>Events           | Haloperidol vs.<br>asenapine    | 1 SR <sup>30</sup> (1 RCT)<br>N=335                           | Moderate                     | Unknown            | Indirect          | Imprecise        | Inconclusive:<br>RR 1.53; 95% 0.74 to<br>3.16                         | Insufficient                                                                        |
| Withdrawal<br>Due to<br>Adverse<br>Events           | Haloperidol vs.<br>aripiprazole | 1 SR <sup>30</sup> (7 RCTs) + 1<br>additional RCT<br>N= 3,232 | Moderate                     | Consistent         | Direct            | Precise          | RR 1.25; 1.07 to 1.47;<br>I <sup>2</sup> =0%                          | Moderate                                                                            |
| Withdrawal<br>Due to<br>Adverse<br>Events           | Haloperidol vs.<br>clozapine    | 1 SR <sup>30</sup> (5 RCTs)<br>N=719                          | Moderate                     | Consistent         | Direct            | Imprecise        | Inconclusive:<br>RR 1.00; 95% CI 0.66<br>to 1.50; I <sup>2</sup> =0%  | Low                                                                                 |
| Withdrawal<br>Due to<br>Adverse<br>Events           | Haloperidol vs.<br>olanzapine   | 1 SR <sup>30</sup> (21 RCTs) +<br>3 RCTs<br>N= 5,708          | Moderate                     | Consistent         | Direct            | Precise          | RR 1.89; 95% CI 1.57<br>to 2.27; I <sup>2</sup> =0%                   | Moderate                                                                            |
| Withdrawal<br>Due to<br>Adverse<br>Events           | Haloperidol vs.<br>quetiapine   | 1 SR <sup>30</sup> (8 RCTs) + 2<br>RCTs<br>N=1,759            | Moderate                     | Consistent         | Direct            | Imprecise        | Inconclusive:<br>RR 1.97; 95% CI 0.96<br>to 4.01; I <sup>2</sup> =62% | Low                                                                                 |
| Withdrawal<br>Due to<br>Adverse<br>Events           | Haloperidol vs.<br>risperidone  | 1 SR <sup>30</sup> (23 RCTs) +<br>2 RCTs<br>N=4,581           | Moderate                     | Consistent         | Direct            | Precise          | RR 1.32; 95% CI 1.09<br>to 1.60; I <sup>2</sup> =0%                   | Moderate                                                                            |
| Withdrawal<br>Due to<br>Adverse<br>Events           | Haloperidol vs.<br>ziprasidone  | 1 SR <sup>30</sup> (6 RCTs) + 1<br>RCT<br>N=1597              | Moderate                     | Consistent         | Direct            | Precise          | RR 1.68; 95% CI 1.26<br>to 2.23; I <sup>2</sup> =0%                   | Moderate                                                                            |

| <b>Outcome</b>                            | <b>Comparators</b>               | <b>Number of Studies<br/>Number of<br/>Subjects</b> | <b>Study<br/>Limitations</b> | <b>Consistency</b> | <b>Directness</b> | <b>Precision</b> | <b>Magnitude of Effect:<br/>Summary Effect Size<br/>(95% CI)</b> | <b>Strength of<br/>Evidence<br/>(High,<br/>Moderate,<br/>Low,<br/>Insufficient)</b> |
|-------------------------------------------|----------------------------------|-----------------------------------------------------|------------------------------|--------------------|-------------------|------------------|------------------------------------------------------------------|-------------------------------------------------------------------------------------|
| Withdrawal<br>Due to<br>Adverse<br>Events | Perphenazine vs.<br>aripiprazole | 1 SR <sup>30</sup> (1 RCT)<br>N=300                 | Moderate                     | Unknown            | Direct            | Imprecise        | Inconclusive:<br>RR 0.53; 95% CI 0.27<br>to 1.05                 | Insufficient                                                                        |
| Withdrawal<br>Due to<br>Adverse<br>Events | Perphenazine vs.<br>olanzapine   | 1 SR <sup>30</sup> (1 RCT)<br>N=597                 | Moderate                     | Unknown            | Direct            | Imprecise        | Inconclusive:<br>RR 0.83; 95% CI 0.58<br>to 1.19                 | Insufficient                                                                        |
| Withdrawal<br>Due to<br>Adverse<br>Events | Perphenazine vs.<br>quetiapine   | 1 SR <sup>30</sup> (1 RCT)<br>N=598                 | Moderate                     | Unknown            | Direct            | Imprecise        | Inconclusive:<br>RR 1.05; 95% CI 0.72<br>to 1.55                 | Insufficient                                                                        |
| Withdrawal<br>Due to<br>Adverse<br>Events | Perphenazine vs.<br>risperidone  | 1 SR <sup>30</sup> (1 RCT)<br>N=602                 | Moderate                     | Unknown            | Direct            | Imprecise        | Inconclusive:<br>RR 1.54; 95% CI 1.00<br>to 2.36                 | Insufficient                                                                        |
| Withdrawal<br>Due to<br>Adverse<br>Events | Perphenazine vs.<br>ziprasidone  | 1 SR <sup>30</sup> (1 RCT)<br>N=446                 | Moderate                     | Unknown            | Direct            | Imprecise        | Inconclusive:<br>RR 1.01; 95% CI 0.65<br>to 1.58                 | Insufficient                                                                        |

CI=confidence interval, OR=odds ratio, RCT=randomized controlled trial, SR=systematic review
